# Supplementary material for: Auditory Contagious Yawning Is Highest Between Friends and Family Members: Support to the Emotional Bias Hypothesis
Source: Front Psychol. 2020 Apr 3;11:442. doi: 10.3389/fpsyg.2020.00442 (PMC7147458; doi:10.3389/fpsyg.2020.00442)
Supplement: Supplementary file 1 [file Data_Sheet_1.CSV]

Trigger	Responder	Contagion	Bond	Trigger_sex	Responder_sex	Trigger_ageclass	Responder_ageclass	Time_slot
LUG	TOM	1	2	M	M	ad	yo	4
LUR	FAB	0	1	M	M	ad	yo	4
CAR	RAZ	0	0	F	F	ad	yo	3
ELP	ROT	0	0	F	F	ad	yo	2
CAM	PGM	0	0	M	F	ad	yo	4
SPV	SPV1	0	0	M	M	ad	yo	3
SPV	SPV2	0	0	M	M	ad	yo	3
SPV	SPV3	0	0	M	M	ad	yo	3
SPV	SPV4	0	0	M	M	ad	yo	3
CAR	RYY	0	0	F	F	ad	yo	3
CDG	SSM	0	0	F	F	ad	yo	3
CAD	ALG	0	1	M	M	ad	ad	4
CAD	ALG	1	1	M	M	ad	ad	4
ALG	CAD	0	1	M	M	ad	ad	4
ANZ	CAD	1	2	F	M	ad	ad	4
ANZ	CAD	1	2	F	M	ad	ad	3
ANZ	CAD	0	2	F	M	ad	ad	5
ANZ	ALG	0	2	F	M	ad	ad	5
ANZ	ALG	1	2	F	M	ad	ad	3
ANZ	ALG	1	2	F	M	ad	ad	4
ANZ	CAD	0	2	F	M	ad	ad	4
ANZ	ALG	1	2	F	M	ad	ad	2
ANZ	CAD	0	2	F	M	ad	ad	2
ANZ	ALG	1	2	F	M	ad	ad	3
ANZ	CAD	1	2	F	M	ad	ad	1
ANZ	CAD	0	2	F	M	ad	ad	5
EET	CAD	1	1	M	M	ad	ad	1
EET	ALG	0	1	M	M	ad	ad	1
EET	CAD	0	1	M	M	ad	ad	2
EET	ALG	0	1	M	M	ad	ad	4
EET	ALG	1	1	M	M	ad	ad	1
EET	CAD	0	1	M	M	ad	ad	1
WET	ALG	0	1	F	M	ad	ad	5
WET	CAD	0	1	F	M	ad	ad	5
WET	CAD	0	1	F	M	ad	ad	4
WET	ALG	0	1	F	M	ad	ad	4
WET	CAD	0	1	F	M	ad	ad	5
WET	ALG	0	1	F	M	ad	ad	5
STA	RPT	1	0	M	F	ad	ad	2
STA	RDT	0	0	M	M	ad	ad	2
BKET	ALG	0	1	F	M	ad	ad	5
INO	SEV	0	0	M	M	ad	ad	3
INO	RUV	0	0	M	M	ad	ad	3
INO	ITV	0	0	M	M	ad	ad	3
INO	MRC	0	0	M	F	ad	ad	2
INO	FRB	0	0	M	F	ad	ad	2
ELP	CHN	0	1	F	F	ad	ad	6
ELP	CHN	0	1	F	F	ad	ad	6
DIG	ERT	1	1	M	F	ad	ad	2
VAT	BOR	0	1	F	M	ad	ad	3
VAT	BOR	0	1	F	M	ad	ad	3
GDC	CHS	0	1	F	F	ad	ad	4
ADTBIOP	ERT	1	1	M	F	ad	ad	2
INO	CHS	1	2	M	F	ad	ad	3
CDG	DAV	0	1	F	F	ad	ad	3
VAT	DAV	0	1	F	F	ad	ad	3
INO	DAV	0	1	M	F	ad	ad	4
INO	DAV	1	1	M	F	ad	ad	4
CAD	MCA	0	1	M	F	ad	ad	4
CAD	EET	0	1	M	M	ad	ad	3
ALG	MCA	0	1	M	F	ad	ad	4
ALG	MCA	0	1	M	F	ad	ad	4
ALG	EET	1	1	M	M	ad	ad	2
CAD	EET	1	1	M	M	ad	ad	4
ANZ	MCA	1	1	F	F	ad	ad	3
ANZ	EET	1	1	F	M	ad	ad	3
ANZ	MCA	0	1	F	F	ad	ad	5
ANZ	MCA	0	1	F	F	ad	ad	4
ANZ	MCA	0	1	F	F	ad	ad	2
ELD	ERA	1	3	F	F	ad	ad	2
CDG	STC	0	1	F	M	ad	ad	3
CDG	FRN	0	1	F	F	ad	ad	3
EET	MCA	0	1	M	F	ad	ad	1
MCA	EET	0	1	F	F	ad	ad	4
EET	MCA	0	1	M	F	ad	ad	2
EET	MCA	0	1	M	F	ad	ad	4
EET	MCA	0	1	M	F	ad	ad	1
WET	MCA	0	1	F	F	ad	ad	5
WET	MCA	0	1	F	F	ad	ad	4
WET	MCA	0	1	F	F	ad	ad	5
VAT	CDG	0	1	F	F	ad	ad	3
VAT	CDG	0	1	F	F	ad	ad	3
BKET	MCA	0	1	F	F	ad	ad	5
INO	CDG	0	1	M	F	ad	ad	4
ELD	ERA	1	3	F	F	ad	ad	4
ELD	ERA	1	3	F	F	ad	ad	4
INO	ELD	0	1	M	F	ad	ad	5
CHS	ELD	0	1	F	F	ad	ad	3
SCE	S2CE	0	0	M	M	ad	ad	4
CDG	GBR	0	1	F	M	ad	ad	3
CDG	GBM	0	0	F	F	ad	ad	3
CDG	GBR	0	1	F	M	ad	ad	3
CHC	LOM	0	1	F	M	ad	ad	4
VAT	GBR	0	1	F	M	ad	ad	3
CTA	SCTA	0	0	F	M	ad	ad	3
GDC	ELD	1	2	F	F	ad	ad	5
GDC	ELD	0	1	F	F	ad	ad	4
INO	GBR	0	1	M	M	ad	ad	4
INO	GBR	0	1	M	M	ad	ad	4
BRT1	MAGY	0	1	M	M	ad	ad	5
SLC	S2LC	0	0	M	M	ad	ad	5
SLC	S3LC	0	0	M	M	ad	ad	5
MAT	LOM	0	1	M	M	ad	ad	4
MAT	CHC	0	1	M	F	ad	ad	4
CAD	WET	0	1	M	F	ad	ad	4
ALG	WET	0	1	M	F	ad	ad	4
ALG	WET	1	1	M	F	ad	ad	4
ANZ	WET	1	1	F	F	ad	ad	5
ANZ	WET	0	1	F	F	ad	ad	4
ANZ	WET	1	1	F	F	ad	ad	5
ANZ	WET	0	1	F	F	ad	ad	5
ANZ	WET	1	1	F	F	ad	ad	2
ELP	LUG	0	1	F	M	ad	ad	6
CAM	CHC	1	2	M	F	ad	ad	4
CDG	VT	0	1	F	F	ad	ad	3
CDG	VT	1	1	F	F	ad	ad	3
CDG	VT	0	1	F	F	ad	ad	3
INO	VT	0	1	M	F	ad	ad	4
CAM	ELD	1	2	M	F	ad	ad	3
CDG	LON	1	1	F	M	ad	ad	3
ELP	ELS	0	1	F	F	ad	ad	6
INO	LON	1	1	M	M	ad	ad	4
KEF	DAV	0	1	M	F	ad	ad	4
CDG	KEF	0	1	F	M	ad	ad	3
D3	D2	1	2	F	F	ad	ad	4
GIO	INO	1	3	M	F	ad	ad	5
GIO	INO	1	3	M	M	ad	ad	5
GIO	INO	1	3	M	F	ad	ad	5
GIO	INO	1	3	M	M	ad	ad	5
ALD	ILV	1	3	M	F	ad	ad	3
ELP	INO	0	1	F	M	ad	ad	6
ELP	INO	0	1	F	M	ad	ad	2
INO	KEF	0	1	M	M	ad	ad	4
INO	KEF	0	1	M	M	ad	ad	4
ELS	INO	1	2	F	M	ad	ad	6
GIO	INO	1	3	M	M	ad	ad	5
GIO	INO	1	3	M	M	ad	ad	5
INO	ELS	0	1	M	F	ad	ad	6
ELP	INO	0	1	F	M	ad	ad	1
ELP	ELS	1	2	F	F	ad	ad	6
ELP	ELS	1	2	F	F	ad	ad	6
MIL	RGM	0	0	M	M	ad	ad	5
GIO	BAR	0	1	M	F	ad	ad	5
GIO	BAR	0	1	M	F	ad	ad	6
GIO	BAR	0	1	M	F	ad	ad	6
CAR	MAL	0	0	F	M	ad	ad	3
INO	CAR	0	0	M	F	ad	ad	2
SRGP	CAR	0	0	F	F	ad	ad	4
MAO	CAR	1	2	F	F	ad	ad	2
MAO	CAR	1	2	F	F	ad	ad	4
MIL	RGF	0	0	M	F	ad	ad	5
ELD	ST4	1	0	F	M	ad	ad	1
CHS	GDC	1	2	F	F	ad	ad	3
UAT	CLT2	0	0	M	M	ad	ad	4
LUG	MCP	1	1	M	F	ad	ad	6
INO	CLAB	0	0	M	M	ad	ad	6
BRT1	AF1	1	1	M	F	ad	ad	5
LAU	BEG	1	2	F	F	ad	ad	4
D2	D1	0	0	F	F	ad	ad	4
D1	D2	0	0	F	F	ad	ad	4
D2	M1	0	1	F	M	ad	ad	4
GDC	CSB2	0	0	F	M	ad	ad	3
ELS	INO	0	1	F	M	ad	ad	6
ELP	CLAB	0	0	F	M	ad	ad	6
ELP	STA	0	0	F	M	ad	ad	1
BRT1	AM2	0	0	M	M	ad	ad	5
CAM	LUG	0	1	M	M	ad	ad	6
MIL	S1G	0	0	M	M	ad	ad	5
CAD	BKET	0	1	M	F	ad	ad	4
ALG	BKET	0	1	M	F	ad	ad	4
ALG	BKET	0	1	M	F	ad	ad	4
CAD	BKET	1	1	M	F	ad	ad	1
ANZ	BKET	0	1	F	F	ad	ad	5
ANZ	BKET	0	1	F	F	ad	ad	4
ANZ	BKET	0	1	F	F	ad	ad	5
ANZ	BKET	1	1	F	F	ad	ad	5
SAL	SIF	0	1	F	M	ad	ad	1
SAL	SIF	0	1	F	M	ad	ad	1
WET	BKET	0	1	F	F	ad	ad	5
ZLW	DAA	1	2	F	F	ad	ad	6
INO	DAN	1	2	M	F	ad	ad	4
ELS	ELP	1	2	F	F	ad	ad	6
ELS	ELP	0	1	F	F	ad	ad	6
INO	ELP	1	1	M	F	ad	ad	4
INO	GDC	0	2	M	F	ad	ad	1
INO	GDC	1	2	M	F	ad	ad	2
INO	GDC	1	2	M	F	ad	ad	4
ELP	GDC	1	2	F	F	ad	ad	1
LUR	ELP	1	3	M	F	ad	ad	2
LUR	ELP	1	3	M	F	ad	ad	2
UAT	CLT	0	0	M	M	ad	ad	4
INO	EAE	0	0	M	M	ad	ad	3
D2	D3	1	2	F	F	ad	ad	4
MIL	S2G	0	0	M	M	ad	ad	5
CDG	MG	0	1	F	M	ad	ad	3
ELP	LUG	1	2	F	M	ad	ad	4
CRI	CRIST	0	3	F	M	ad	ad	2
CHC	CAM	1	2	F	M	ad	ad	4
CDG	OLI	0	1	F	M	ad	ad	3
ALD	CAR	0	0	M	F	ad	ad	3
CAM	AN1	0	1	M	F	ad	ad	2
CAM	AN1	0	1	M	F	ad	ad	2
ELS	CLB	0	1	F	M	ad	ad	6
ELP	SCZ	0	0	F	M	ad	ad	4
SCW	SCZ	0	0	M	M	ad	ad	4
BRT1	BRT3	0	1	M	M	ad	ad	5
BRT1	BRT4	0	1	M	M	ad	ad	5
BRT1	BRT5	0	1	M	M	ad	ad	5
BRT1	BRT6	0	1	M	M	ad	ad	5
MAO	SRGP	0	0	F	F	ad	ad	4
MAO	SRGP	0	0	F	F	ad	ad	4
MAO	SRGP	0	0	F	F	ad	ad	4
MAO	SRGP	0	0	F	F	ad	ad	4
MAO	SRGP	0	0	F	F	ad	ad	4
GDC	CAR	1	2	F	M	ad	ad	5
INO	CAM	1	3	M	M	ad	ad	3
INO	CAM	1	3	M	M	ad	ad	3
INO	CAM	1	3	M	M	ad	ad	5
INO	CAM	1	3	M	M	ad	ad	6
INO	CAM	1	3	M	M	ad	ad	5
INO	CAM	1	3	M	M	ad	ad	5
INO	CAM	1	3	M	M	ad	ad	2
INO	MAO	0	1	M	F	ad	ad	2
NIQ	CAM	0	1	F	M	ad	ad	6
MAO	CAM	0	2	F	M	ad	ad	2
PAT	LUR	1	3	F	M	ad	ad	4
ELD	LUR	0	1	F	M	ad	ad	4
ELD	LUR	0	1	F	M	ad	ad	6
CHC	MAT	0	2	F	M	ad	ad	4
CHC	MAT	0	1	F	M	ad	ad	4
ELP	LUR	1	3	F	M	ad	ad	3
ELP	LUR	1	3	F	M	ad	ad	1
ELP	LUR	1	3	F	M	ad	ad	6
MAO	SCFGP	0	0	F	F	ad	ad	4
MAO	SCFGP	0	0	F	F	ad	ad	4
MAO	SCFGP	0	0	F	F	ad	ad	4
MAO	SCFGP	0	0	F	F	ad	ad	4
MAO	SCFGP	0	0	F	F	ad	ad	4
ELP	NAT	0	1	F	M	ad	ad	6
ELP	NAT	0	1	F	M	ad	ad	6
ELP	NAT	0	1	F	M	ad	ad	6
PIP	MIK	0	3	F	M	ad	ad	5
ELP	LUR	1	3	F	M	ad	ad	4
ELP	LUR	1	3	F	M	ad	ad	5
ELP	LUR	1	3	F	M	ad	ad	1
LUR	PAT	1	3	M	F	ad	ad	4
LUR	PAT	1	3	M	F	ad	ad	4
FVA	LUR	0	1	M	M	ad	ad	5
PAT	MTY	0	0	F	F	ad	ad	4
PAT	MTZ	0	0	F	F	ad	ad	4
PAT	MOY	1	0	F	F	ad	ad	4
MTX	MOW	1	1	M	F	se	ad	4
MOY	MOW	0	0	F	F	ad	ad	4
MTY	MOZ	0	0	M	F	ad	ad	4
ELP	PAT	1	3	F	F	ad	ad	3
MIK	MAZ	0	1	M	M	ad	ad	2
SAL	ROB	0	1	F	M	ad	se	1
SAL	ROB	0	1	F	M	ad	se	1
SPV	PPV	0	0	M	F	ad	se	3
SPV	PPV2	0	0	M	F	ad	se	3
MOY	MTW	0	0	F	M	ad	se	4
MTY	MTW	0	0	M	M	ad	se	4
ELP	GRZ	1	3	F	M	ad	se	4
SLC	S1LC	0	0	M	M	ad	se	5
SRGP	SCGP	0	0	F	M	ad	se	4
SRGP	MSGP	0	0	F	F	ad	se	4
INO	CLA	1	3	M	F	ad	se	5
INO	CLA	1	3	M	F	ad	se	4
CAM	CLA	0	1	M	F	ad	se	3
INO	NOV	0	1	M	M	ad	se	5
REQ	NOV	1	1	M	M	ad	se	4
CAM	NOV	0	1	M	M	ad	se	3
NOV	REQ	1	1	M	M	se	ad	4
SCGP	SRGP	0	0	M	F	se	ad	4
SCGP	SCFGP	0	0	M	F	se	ad	4
GRZ	NICU	0	1	M	M	se	ad	3
ROS	LUR	0	1	M	M	se	ad	5
ROS	LUR	0	1	M	M	se	ad	6
ROS	LUR	0	1	M	M	se	ad	5
MAE	LUR	0	1	F	M	se	ad	5
MTX	MTW	0	0	M	M	se	se	4
NOV	CLA	1	3	M	F	se	se	4
NOV	CLA	1	3	M	F	se	se	4
MAE	GRZ	0	3	F	M	se	se	5
GRZ	MAE	1	3	M	F	se	se	3
CLA	NOV	1	3	F	M	se	se	4
STX	STAY	1	2	M	F	yo	yo	6
CAD	SDCAD	1	1	M	F	yo	yo	2
S1R	S2R	0	0	F	F	yo	ad	1
S1R	S3R	0	0	F	F	yo	ad	1
TOM	LUR	1	3	M	M	yo	ad	3
TOM	LUG	0	1	M	M	yo	ad	6
